# Supplementary material for: The discovery and structural basis of two distinct state-dependent inhibitors of BamA
Source: PubMed Central journal article supplement — Nat Commun. 2024 Oct 8;15:8718. doi: 10.1038/s41467-024-52512-1 (PMC11461620; doi:10.1038/s41467-024-52512-1), 2024-10-08
Supplement: 41467_2024_52512_MOESM1_ESM.pdf [file 41467_2024_52512_MOESM1_ESM.pdf]

## Supplementary Information for

### Discovery of state-dependent inhibitors of the bacterial $\beta$ -barrel assembly machine

Dawei Sun<sup>1,\*</sup>, Kelly M. Storek<sup>2,\*</sup>, Dmitry Tegunov<sup>1,\*</sup>, Ying Yang<sup>3</sup>, Christopher P. Arthur<sup>1,10</sup>, Matthew Johnson<sup>1</sup>, John G. Quinn<sup>4</sup>, Weijing Liu<sup>5</sup>, Guanghui Han<sup>5,11</sup>, Hany S. Girgis<sup>2</sup>, Mary Kate Alexander<sup>2</sup>, Austin K. Murchison<sup>2</sup>, Stephanie Shriver<sup>6</sup>, Christine Tam<sup>6</sup>, Hiroshi Ijiri<sup>7</sup>, Hiroko Inaba<sup>7</sup>, Tatsuya Sano<sup>7</sup>, Hayato Yanagida<sup>7</sup>, Junichi Nishikawa<sup>7</sup>, Christopher E. Heise<sup>4,12</sup>, Wayne J. Fairbrother<sup>8</sup>, Man-Wah Tan<sup>2</sup>, Nicholas Skelton<sup>3</sup>, Wendy Sandoval<sup>5</sup>, Benjamin D. Sellers<sup>3,13</sup>, Claudio Ciferri<sup>1</sup>, Peter A. Smith<sup>2,14</sup>, Patrick C. Reid<sup>7</sup>, Christian N. Cunningham<sup>9,15†</sup>, Steven T. Rutherford<sup>2†</sup>, Jian Payandeh<sup>1,2,16†</sup>

<sup>1</sup>Genentech Inc., Structural Biology; South San Francisco, CA, United States.

<sup>2</sup>Genentech Inc., Infectious Diseases; South San Francisco, CA, United States.

<sup>3</sup>Genentech Inc., Discovery Chemistry; South San Francisco, CA, United States.

<sup>4</sup>Genentech Inc., Biochemical and Cellular Pharmacology; South San Francisco, CA, United States.

<sup>5</sup>Genentech Inc., Microchemistry, Proteomics and Lipidomics; South San Francisco, CA, United States.

<sup>6</sup>Genentech Inc., BioMolecular Resources; South San Francisco, CA, United States.

<sup>7</sup>PeptiDream Inc., Kawasaki, Kanagawa, Japan.

<sup>8</sup>Genentech Inc., Early Discovery Biochemistry; South San Francisco, CA, United States.

<sup>9</sup>Genentech Inc., Peptide Therapeutics; South San Francisco, CA, United States.

<sup>10</sup>Current: Altos Labs; Redwood City, CA, United States.

<sup>11</sup>Current: PTM Bio; Alameda, CA, United States.

<sup>12</sup>Current: Septerna; South San Francisco, CA, United States.

<sup>13</sup>Current: Vilya; South San Francisco, CA, United States.

<sup>14</sup>Current: Revagenix; San Mateo, CA, United States.

<sup>15</sup>Current: PeptiDream; Kawasaki, Japan.

<sup>16</sup>Current: Exelixis; Alameda, CA, United States.

\*These authors contributed equally to this work: D.S., K.M.S., and D.T.

†Corresponding authors. Email: C-cunningham@peptidream.com (C.C.); rutherford.steven@gene.com (S.T.R.); jpayandeh@exelixis.com (J.P.)

#### Contents

|                              | pages |
|------------------------------|-------|
| - Supplementary Figures 1-14 | 2-26  |
| - Supplementary Tables 1-2   | 27-29 |
| - Supplementary References   | 30    |

# Supplementary Figure 1

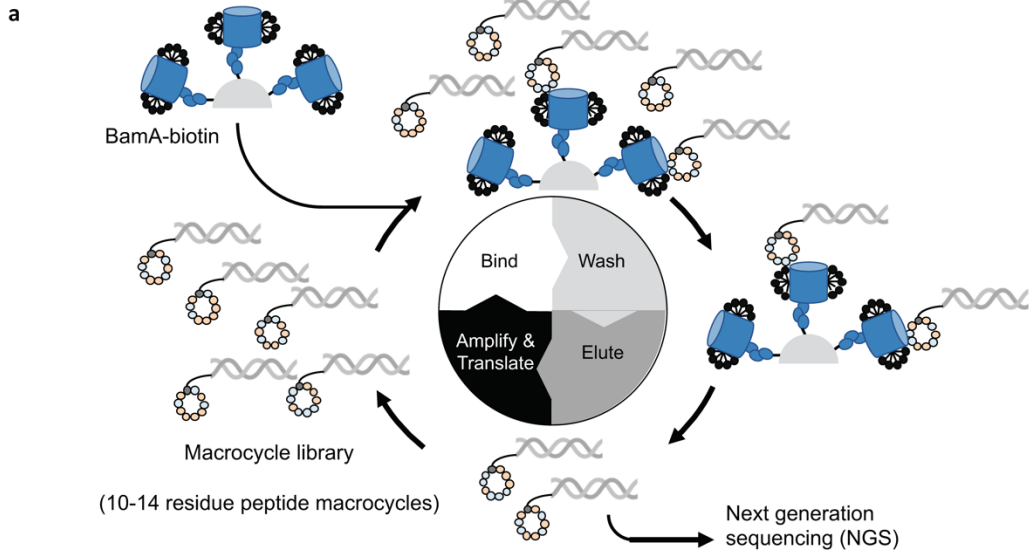

**b**

Selections performed against BamA in octylglucoside

| Macrocycle | Sequence                      | Frequency | ELISA | MIC ( $\mu\text{M}$ ) |
|------------|-------------------------------|-----------|-------|-----------------------|
| PTB1       | F V W H G S R mF H R H C      | 63.04     | +     | 50                    |
| 114        | F Y H G H mF H L W C          | 11.34     | +     | >100                  |
| 115        | F Y H N H mF H L W C          | 1.31      | +     | >100                  |
| 116        | F R mF mA V Y W W Y D mF C    | 1.28      | +     | >100                  |
| 117        | F P H mF V mF N W V H V H Y C | 1.14      | +     | >100                  |
| 118        | F W G H Y P D mF Y mF V H C   | 1.06      | +     | >100                  |
| 119        | F R G Y V mG V Y W Y W C      | 1.03      | +     | >100                  |
| 120        | F H Y N mF R mA mF N V S W C  | 0.74      | +     | >100                  |
| 122        | F G mF mA V Y W W Y D L C     | 0.73      | +     | >100                  |
| 121        | F R G Y V mG V Y W Y D C      | 0.73      | +     | >100                  |
| 123        | F R mF mA V Y W W Y D L C     | 0.67      | +     | >100                  |
| 124        | F R mF mA V Y W W Y S mF C    | 0.61      | +     | >100                  |
| 125        | F V W H G S R mF H L W C      | 0.36      | +     | >100                  |
| 127        | F L H Y H R S V L H D mF C    | 0.34      | +     | >100                  |

Selections performed against BAM in octylglucoside

| Macrocycle | Sequence                    | Frequency | ELISA | MIC ( $\mu\text{M}$ ) |
|------------|-----------------------------|-----------|-------|-----------------------|
| PTB2       | F G T I H K R R F R Y W F C | 0.08      | +     | 4                     |
| 94         | F S I W Y F H P G V V I V C | 73.72     | +     | >100                  |
| 95         | F S Y V R K S I V R K R F C | 6.76      | +     | >100                  |
| 96         | F S V H R G E I I R K S F C | 2.67      | +     | >100                  |
| 99         | F S V T R G F I I R K W F C | 0.67      | +     | >100                  |
| 109        | F S V H R G D I I R K S F C | 0.20      | +     | >100                  |
| 111        | F H R I R R L A I Y W Y C   | 0.15      | +     | >100                  |
| 154        | F S Y V S G R I I R K V F C | 0.11      | +     | >100                  |
| 155        | F L Y Y N R S F L W F S W C | 0.09      | +     | >100                  |

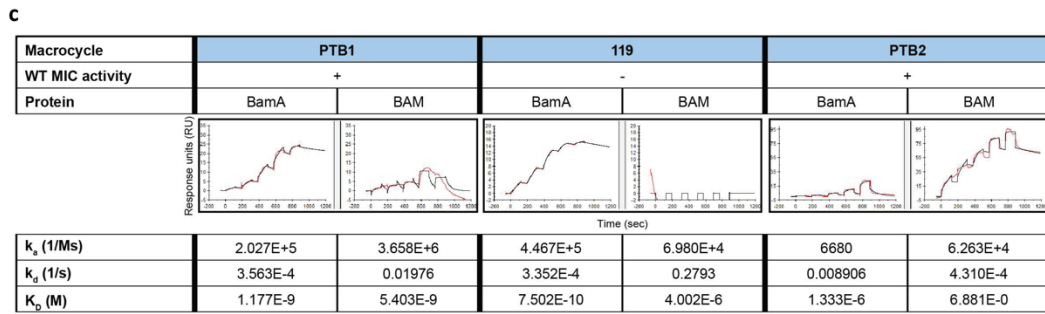

**Supplementary Figure 1. Discovery of macrocyclic peptides targeting BamA.**

- a.** Schematic of the mRNA display macrocycle discovery approach. See methods for details. BamA-biotin (with POTRA3-5 domains) is shown in blue and NGS indicates next generation sequencing.
- b.** Exemplar macrocycles from mRNA display selections against BamA (with POTRA3-5 domains) recombinant protein and purified BAM complex with NGS frequency and MIC activity against *E. coli* ATCC 25922 done in high-throughput during the discovery process are indicated.
- c.** SPR sensorgrams of indicated macrocycles binding to BamA or the BAM complex in octyl-glucoside detergent conditions at 25°C *in vitro*. Data traces (red) and 1:1 binding modeling (black), which was used to derive indicated kinetic constants, are shown. Peptide 119 is shown as an example of a macrocycle that binds but lacks wild-type MIC activity. These binding observations were used as single experiments to choose macrocycles in our discovery selection funnel and not to analyze the binding kinetics and are thus shown only to illustrate the extent of observed binding.

## Supplementary Figure 2

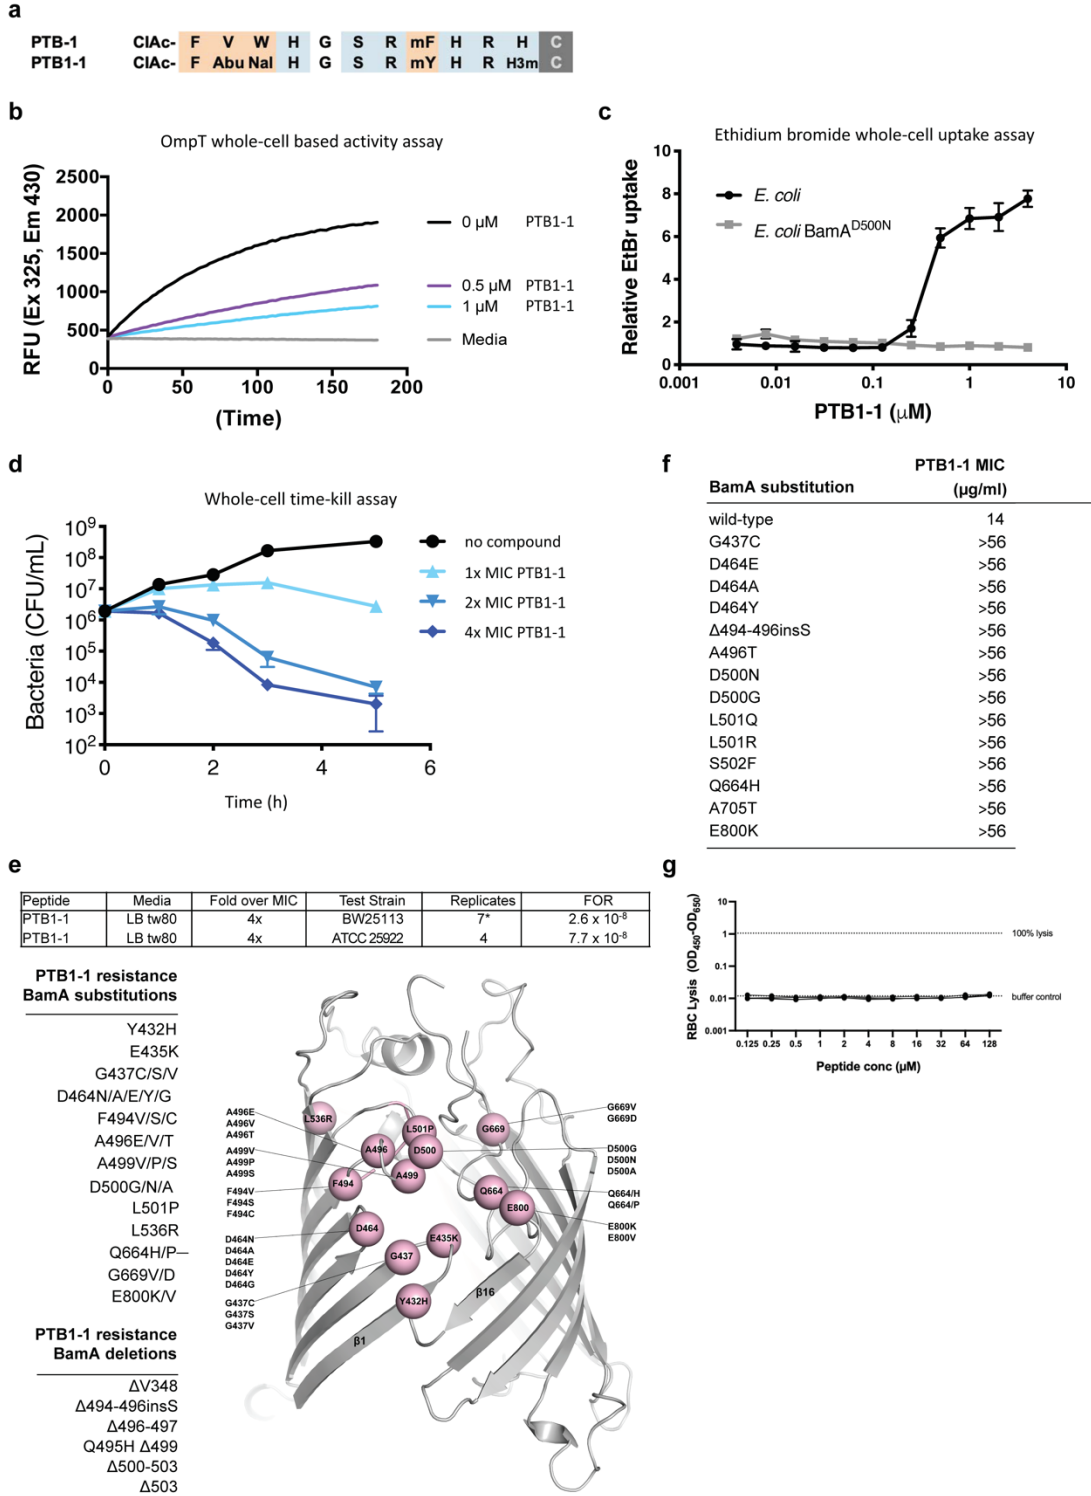

### **Supplementary Figure 2. Characterization of PTB1-1.**

- a.** Schematic of the 12-amino acid sequences of the BamA-binding macrocycles PTB1 and PTB1-1.
- b.** A fluorogenic OmpT peptide substrate was used to assay BAM activity in live *E. coli* BW25113 cells in the absence (black) or presence of PTB1-1 (0.5  $\mu$ M in purple, 1  $\mu$ M in cyan). A media control is shown in gray. The means of quadruplicate technical replicates is plotted and is a representative of two independent experiments. Data used to generate the plot are provided in Supplementary Data S2B in the Source Data.
- c.** An ethidium bromide uptake assay performed against *E. coli* BW25113 was used to monitor outer membrane permeability in the presence of increasing concentrations of the BamA-binding macrocycle PTB1-1. Assay was performed with wild-type (black circles) and a PTB1-1-resistant mutant strain (D500N) (gray squares). The means and standard deviations of quadruplicate technical replicates is plotted and is a representative of two independent experiments. Data used to generate the plot are provided in Supplementary Data S2C in the Source Data.
- d.** A time-kill assay performed against wild-type *E. coli* BW25113 was performed in the absence (black) or presence of PTB1-1 (1x MIC in light blue, 2x MIC in blue, and 4x MIC in dark blue). The average and standard deviation of CFU/mL at times after addition of the macrocycles is plotted. The means and standard deviations of triplicate technical replicates (n=3) is plotted. Data used to generate the plot are provided in Supplementary Data S2D in the Source Data.
- e.** Frequencies of resistance calculated from selections performed with PTB1-1 against wild-type *E. coli* BW25113 and wild-type *E. coli* ATCC 25922 were determined at 4x MIC. The position of each PTB1-1 resistant substitution is highlighted on the closed lateral gate structure of PTB1-1-BamA as pink spheres, with the macrocycle removed for clarity.
- f.** Minimal Inhibitory Concentrations (MICs) of PTB1-1 against wild-type *E. coli* BW25113 and mutants selected for resistance to PTB1-1.
- g.** Red blood cell (RBC) lysis assay with PTB1-1. Lysis was measured after 4 hours of incubation with indicated concentrations of PTB1-1, 0.5% Triton X-100 (set to 100% lysis), or buffer (set to 0% lysis). Assay was performed in quadruplicate and all four replicates are plotted. Data used to generate the plot are provided in Supplementary Data S2G in the Source Data.

### Supplementary Figure 3

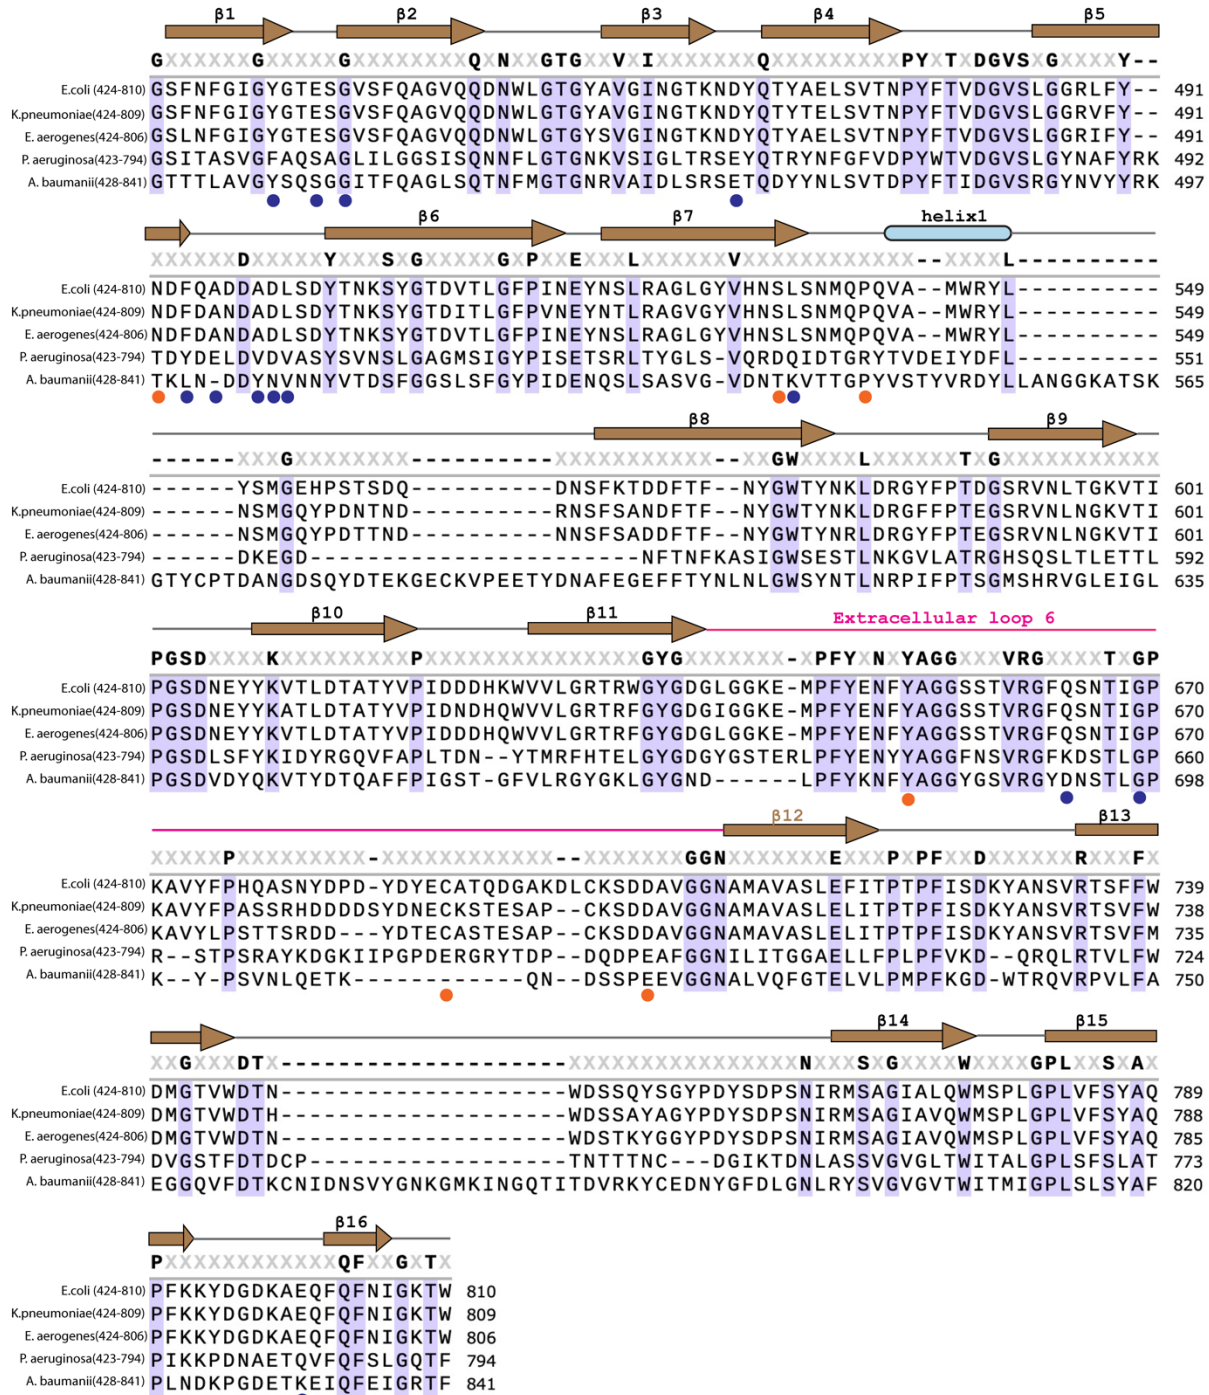

### Supplementary Figure 3. BamA β-barrel sequence alignment.

Alignment of the BamA β-barrel sequences from *E. coli* (residues 424-810), *K. pneumoniae* (residues 424-809), *E. aerogenes* (residues 424-806), *P. aeruginosa* (residues 423-794), and *A. baumannii* (residues 428-841). Secondary structural features (as observed in PTB1-1-BAM structure) are indicated above the sequence. Residues with a consensus score >70% are highlighted in purple and positions where substitutions lead to PTB1-1 and PTB2-1 resistance are noted with a blue and orange dot, respectively. Extracellular loop 6 is colored in magenta. Sequences were aligned using SnapGene (version 6.2.1).

# Supplementary Figure 4

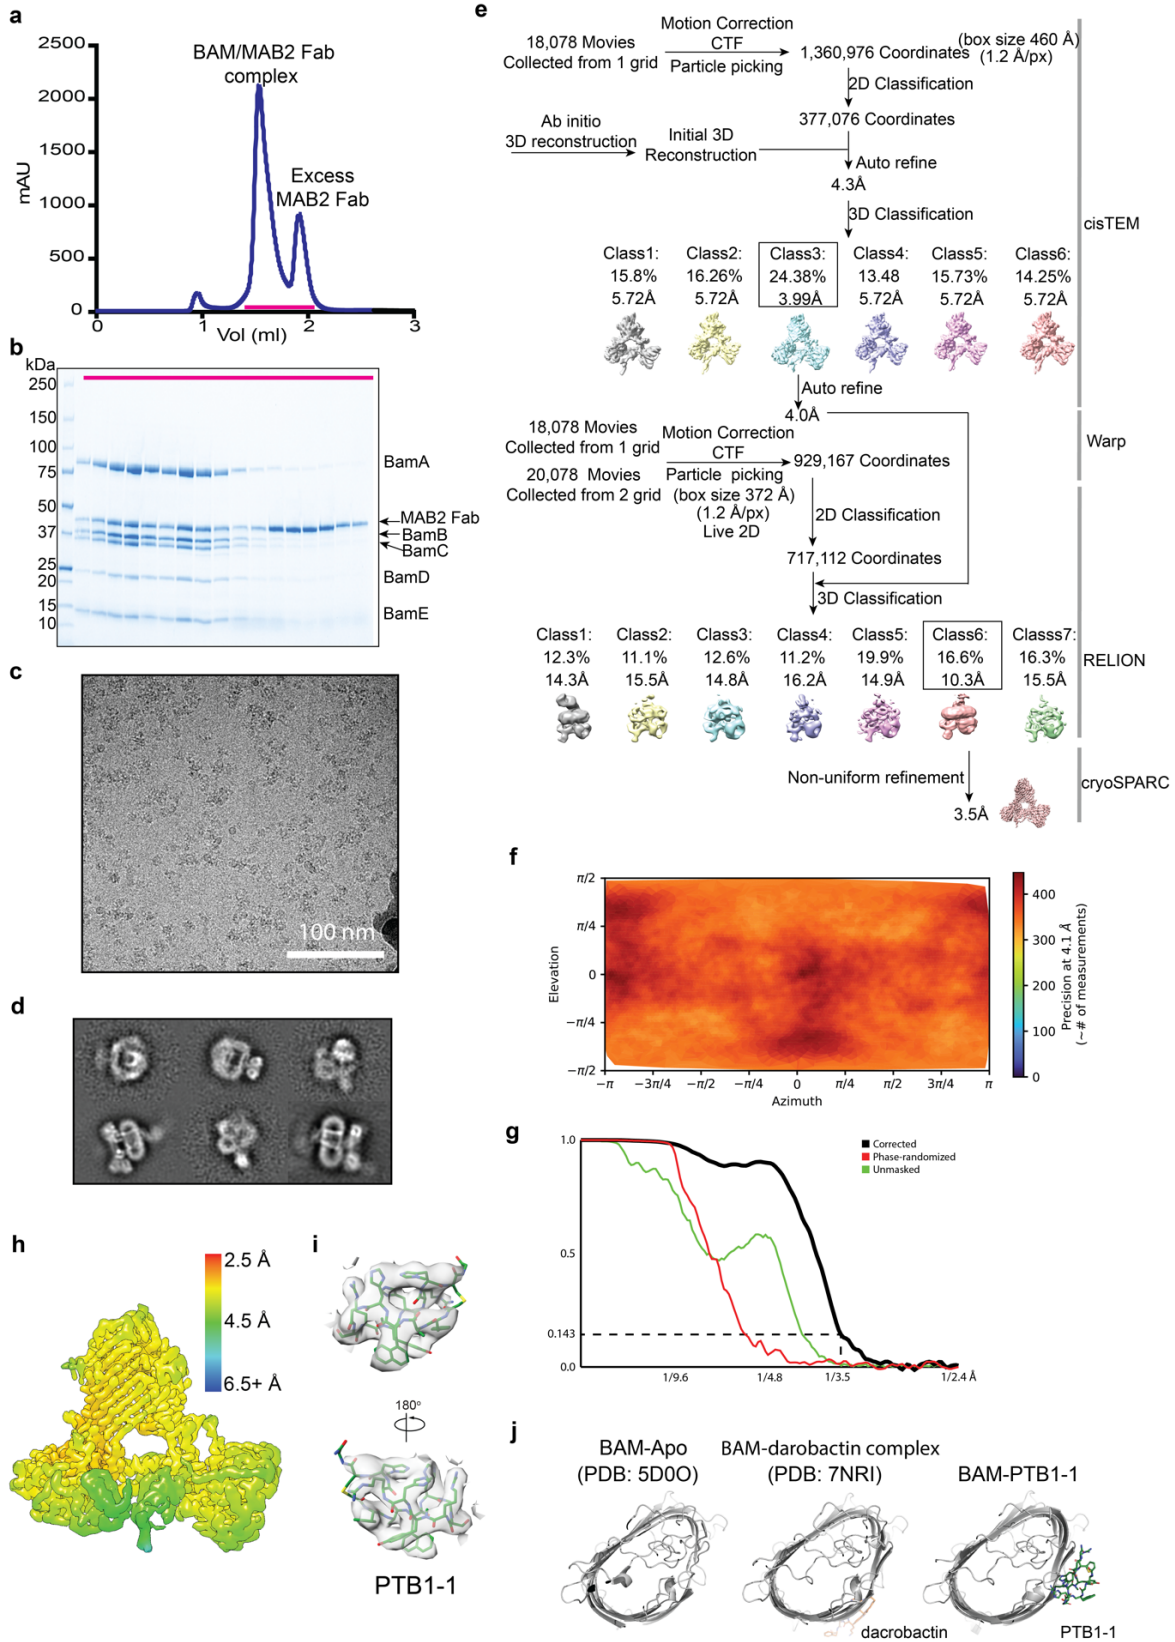

**Supplementary Figure 4. Cryo-EM sample, imaging, and structure determination of the PTB1-1-BAM-MAB2 Fab complex.**

- a.** Size exclusion chromatography (SEC) profile of the BAM-MAB2 Fab complex which was purified in DDM.
- b.** SDS-PAGE analysis of the SEC of the BAM-MAB2 Fab complex. Full uncropped gel image is included in Supplementary Data S4B in the Source Data.
- c.** Representative micrograph of the PTB1-1-BAM-MAB2 Fab complex sample.
- d.** Representative 2D-class averages from cisTEM containing PTB1-1-BAM-MAB2 Fab complex (particle box size: 372 Å).
- e.** Data processing workflow.
- f.** Angular distribution calculated in cryoSPARC for particle projections.
- g.** Gold-standard FSC curves from cryoSPARC and the reported resolution at FSC=0.143 shown by the horizontal line.
- h.** Isosurface rendering of the 3D map with surface coloring according to the local resolution estimated by windowed FSCs.
- i.** Cryo-EM map of PTB1-1.
- j.** BamA (top-down views) structure in the absence of inhibitor (*left*: BAM-*apo*, PDB 5D0O<sup>1</sup>) compared to BamA in the presence of inhibitors (*middle*: BAM-darobactin complex, PDB 7NRI<sup>2</sup>; and *right*: PTB1-1-BAM).



# Supplementary Figure 5

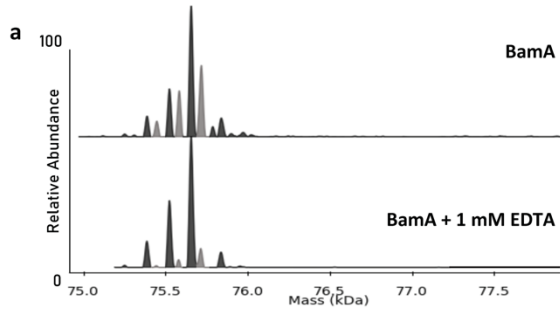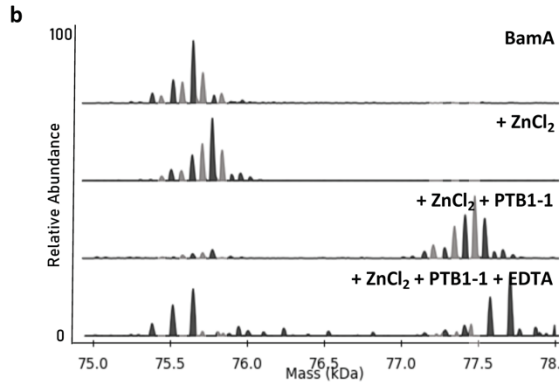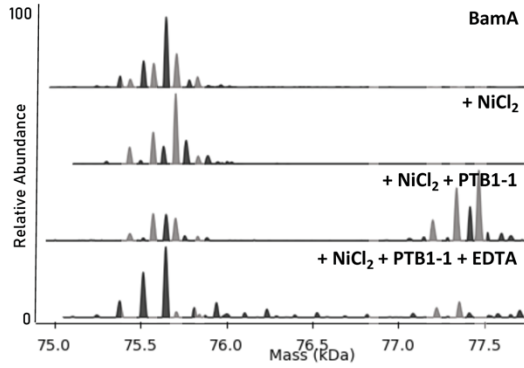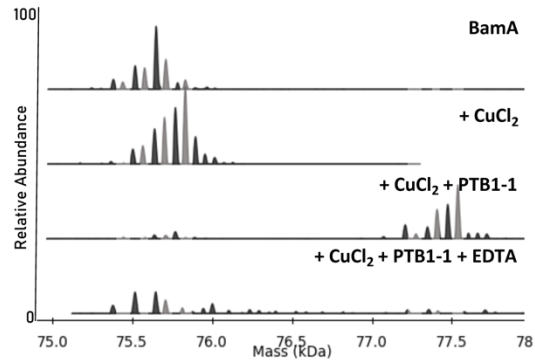

**c**

| PTB1-1 variant | sequence                                                                            | MIC (μM) |
|----------------|-------------------------------------------------------------------------------------|----------|
| PTB1-1         | CIAc- F <sup>Abu</sup> Nst1 H G S R <sup>my</sup> H R <sup>103M}</sup> C G NH2      | 0.2      |
| PTB1-1.A1      | CIAc- A <sup>Abu</sup> Nst1 H G S R <sup>my</sup> H R <sup>103M}</sup> C G NH2      | 12.5     |
| PTB1-1.A2      | CIAc- F A <sup>Nst1</sup> H G S R <sup>my</sup> H R <sup>103M}</sup> C G NH2        | 1.56     |
| PTB1-1.A3      | CIAc- F A <sup>Abu</sup> H G S R <sup>my</sup> H R <sup>103M}</sup> C G NH2         | >100     |
| PTB1-1.A4      | CIAc- F A <sup>Abu</sup> Nst1 A G S R <sup>my</sup> H R <sup>103M}</sup> C G NH2    | >100     |
| PTB1-1.A5      | CIAc- F A <sup>Abu</sup> Nst1 H A S R <sup>my</sup> H R <sup>103M}</sup> C G NH2    | 3.125    |
| PTB1-1.A6      | CIAc- F A <sup>Abu</sup> Nst1 H G A R <sup>my</sup> H R <sup>103M}</sup> C G NH2    | 12.5     |
| PTB1-1.A7      | CIAc- F A <sup>Abu</sup> Nst1 H G S A <sup>103F}</sup> H R <sup>103M}</sup> C G NH2 | >100     |
| PTB1-1.A8      | CIAc- F A <sup>Abu</sup> Nst1 H G S R <sup>my</sup> H A R <sup>103M}</sup> C G NH2  | >100     |
| PTB1-1.mA8     | CIAc- F A <sup>Abu</sup> Nst1 H G S R <sup>my</sup> mA H R <sup>103M}</sup> C G NH2 | >100     |
| PTB1-1.A9      | CIAc- F A <sup>Abu</sup> Nst1 H G S R <sup>my</sup> A R <sup>103M}</sup> C G NH2    | >100     |
| PTB1-1.A10     | CIAc- F A <sup>Abu</sup> Nst1 H G S R <sup>my</sup> H A <sup>103M}</sup> C G NH2    | 50       |
| PTB1-1.A11     | CIAc- F A <sup>Abu</sup> Nst1 H G S R <sup>my</sup> H R <sup>103M}</sup> A C G NH2  | >100     |

**Supplementary Figure 5. Native mass spectrometry analysis of the PTB1-1-BamA complex and PTB1-1 mutational scanning analysis.**

- a.** Mass spectrum of purified BamA in detergent with or without 1 mM EDTA. Spectra are representative of n>3 experiments.
- b.** Mass spectrum of purified BamA in detergent in the presence or absence of 1  $\mu$ M PTB1-1 and 2  $\mu$ M ZnCl<sub>2</sub>, NiCl<sub>2</sub> or CuCl<sub>2</sub>, and/or 1 mM EDTA. Experiments were performed at 1, 2, 5, and 10  $\mu$ M of each metal ion and representatives of n>3 experiments at 2  $\mu$ M are shown.
- c.** Macrocycle sequences and MIC activity against *E. coli* ATCC 25922 indicated.

# Supplementary Figure 6

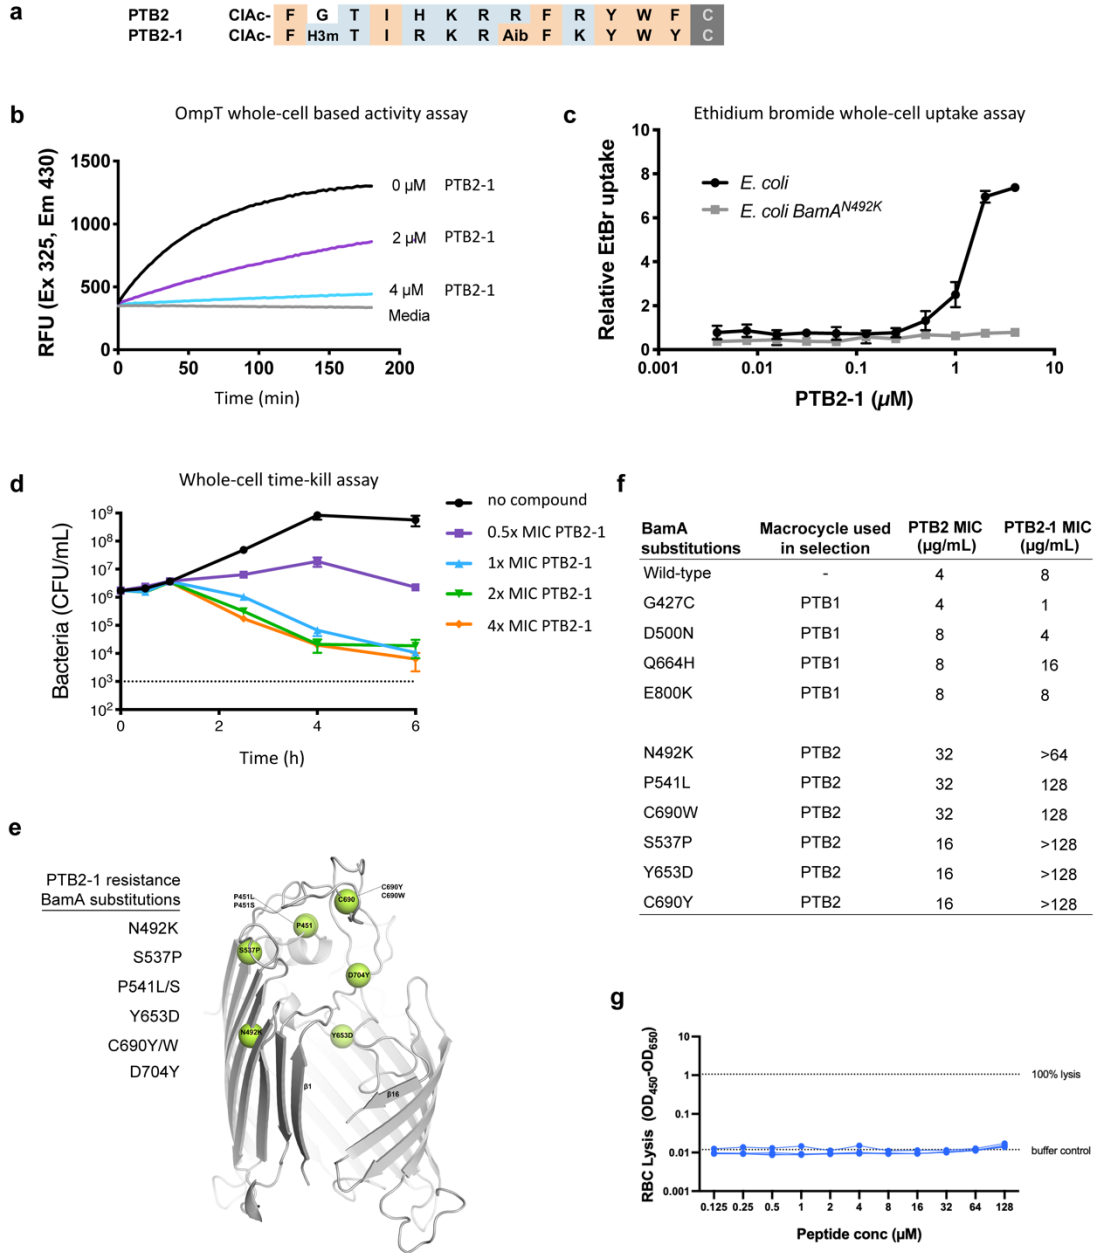

### Supplementary Figure 6. Characterization of PTB2-1.

- a.** Schematic of the 14-amino acid sequences of the BamA-binding macrocycles PTB2 and PTB2-1.
- b.** A fluorogenic OmpT peptide substrate was used to assay BAM activity in live *E. coli* BW25113 cells in the absence (black) or presence of PTB2-1 (2  $\mu$ M in purple, 4  $\mu$ M in cyan). A media control is shown in gray. The means of quadruplicate technical replicates is plotted and is a representative of two independent experiments. Data used to generate the plot are provided in Supplementary Data S6B in the Source Data.
- c.** An ethidium bromide uptake assay performed against *E. coli* BW25113 was used to monitor outer membrane permeability in the presence of increasing concentrations of the BamA-binding macrocycle PTB2-1. Assay was performed with wild-type (black circles) and a PTB2-1-resistant mutant strain (N492K) (gray squares). The means and standard deviations of quadruplicate technical replicates is plotted and is a representative of two independent experiments. Data used to generate the plot are provided in Supplementary Data S6C in the Source Data.
- d.** A time-kill assay performed against wild-type *E. coli* BW25113 was performed in the absence (black) or presence of PTB2-1 (0.5x MIC in purple, 1x MIC in light blue, 2x MIC in green, and 4x MIC in orange). The means and standard deviation of CFU/mL from technical triplicates (n=3) at times after addition of the macrocycles are plotted. The horizontal dashed line is the limit of detection for these experiments. Data used to generate the plot are provided in Supplementary Data S6D in the Source Data.
- e.** The position of each PTB2-1 resistant substitution highlighted on the open lateral gate cryo-EM structure of PTB2-BAM as green spheres, with the macrocycle removed for clarity.
- f.** Minimal Inhibitory Concentrations (MICs) of PTB1 and PTB2-1 against wild-type *E. coli* BW25113 and mutants selected for resistance to PTB1 and PTB2-1.
- g.** Red blood cell (RBC) lysis assay with PTB2-1. Lysis was measured after 4 hours of incubation with indicated concentrations of PTB1-1, 0.5% Triton X-100 (set to 100% lysis), or buffer (set to 0% lysis). Assay was performed in quadruplicate and all four replicates are plotted (and highly overlapping). Data used to generate the plot are provided in Supplementary Data S6G in the Source Data.

# Supplementary Figure 7

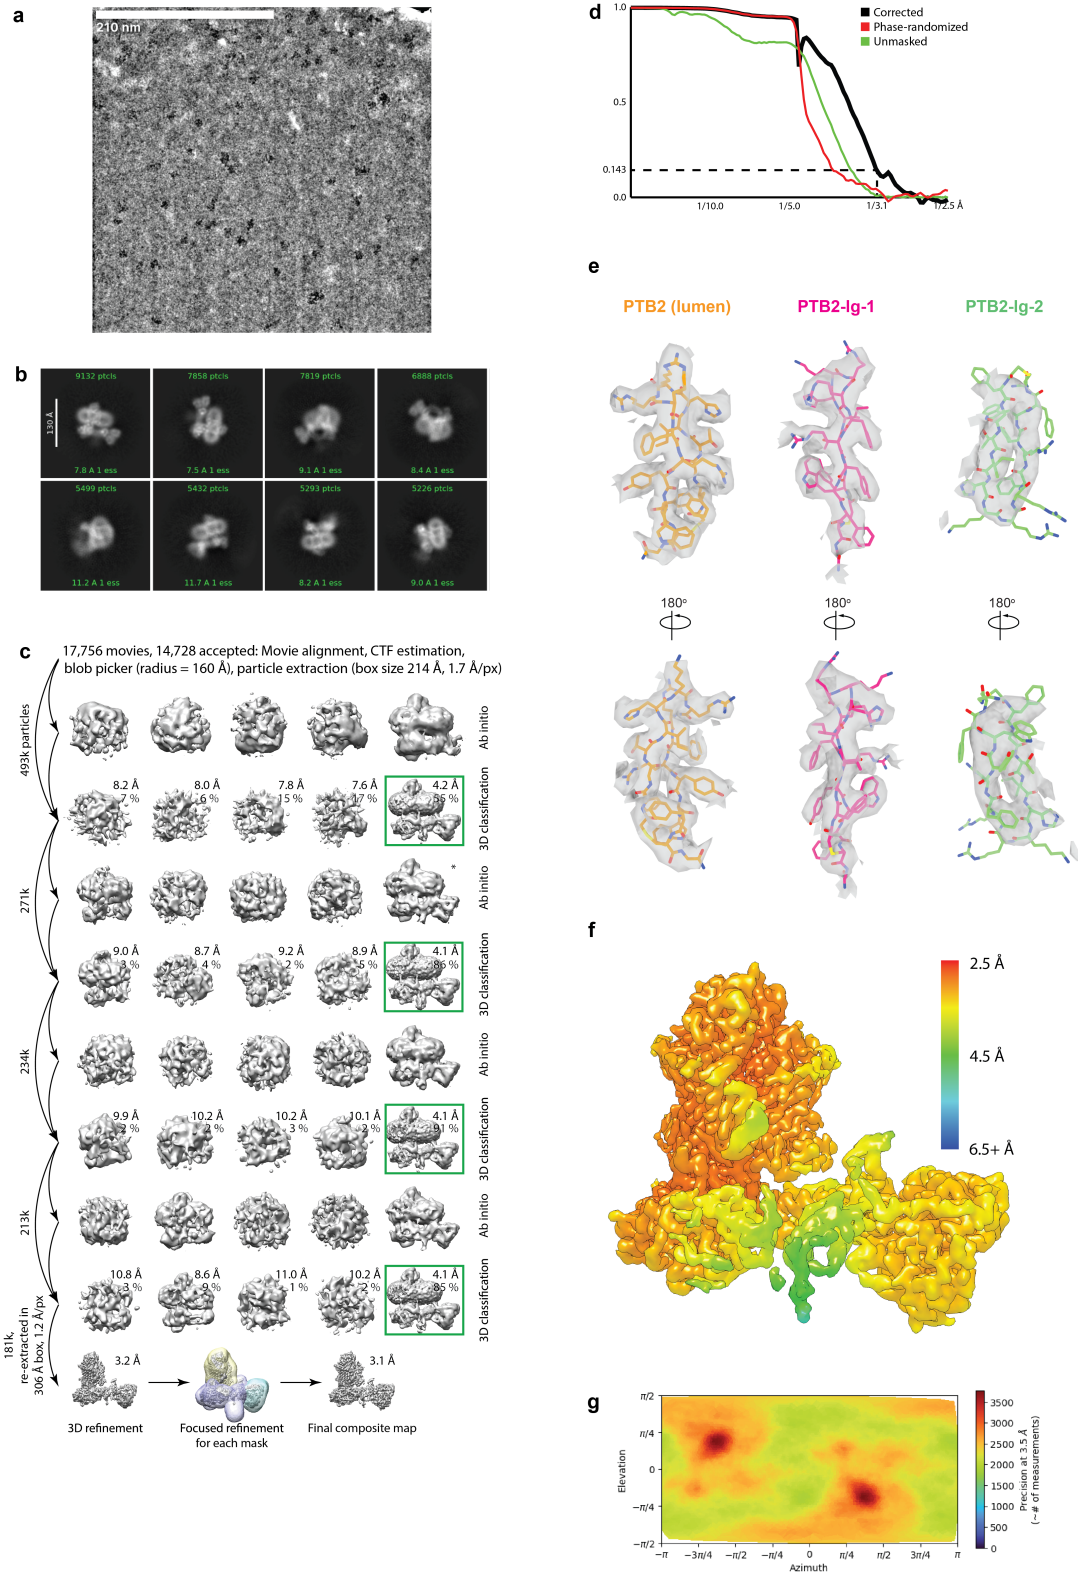

**Supplementary Figure 7. Cryo-EM imaging and structure determination of the PTB2-BAM-DDM complex.**

- a.** Representative micrograph from the data set showing the particle distribution.
- b.** Representative 2D classes from cryoSPARC containing the PTB2-BAM-DDM complex (particle box size: 318 Å).
- c.** Data processing workflow. CryoSPARC was used for all steps. Particles were sorted over 4 iterations of generating *ab initio* references and using them for supervised 3D classification. Green frames mark 3D classes whose particles were selected for the next processing step. \* marks an *ab initio* reference also used for supervised 3D classification of PTB2-SMA data.
- d.** Gold-standard, phase randomization-corrected FSC curves from cryoSPARC and the reported resolution at FSC=0.143 (dashed line).
- e.** 3D map overlay for PTB2-lumen, PTB2-lg-1 and PTB2-lg-2.
- f.** Isosurface rendering of the 3D map with surface coloring according to the local resolution estimated by windowed FSC.
- g.** Direction-dependent Fourier-space coverage calculated in cryoSPARC, showing how many particle images contributed to the reconstruction in each direction.

# Supplementary Figure 8

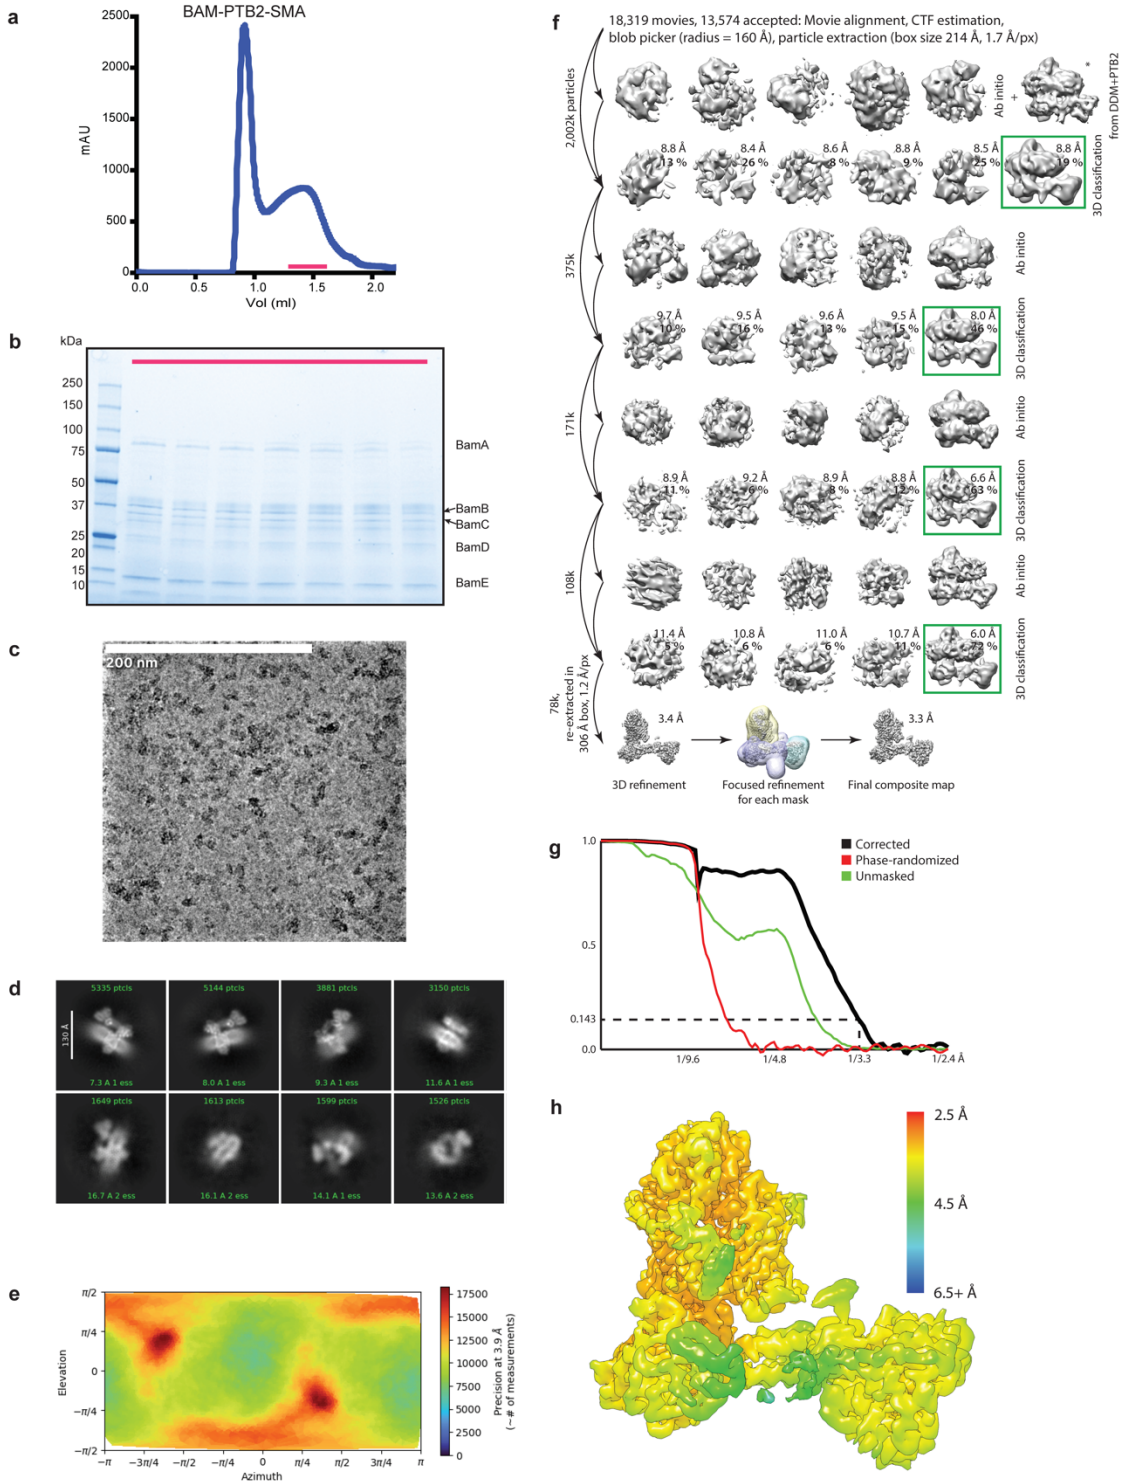

**Supplementary Figure 8. Cryo-EM imaging and structure determination of the PTB2-BAM-SMA complex.**

- a.** SEC profile of the PTB2-BAM-SMA complex.
- b.** SDS-PAGE analysis of the SEC of the PTB2-BAM-SMA complex. Full uncropped gel image is included in Supplementary Data S8B in the Source Data.
- c.** Representative micrograph from the data set; white circles mark final particle selection.
- d.** Representative 2D classes from cryoSPARC containing the PTB2-BAM-SMA complex (particle box size: 280 Å).
- e.** Direction-dependent Fourier-space coverage calculated in cryoSPARC, showing how many particle images contributed to the reconstruction in each direction.
- f.** Data processing workflow. CryoSPARC was used for all steps. Particles were sorted over 4 iterations of generating *ab initio* references and using them for supervised 3D classification. Green frames mark 3D classes whose particles were selected for the next processing step. \* marks a reference borrowed from PTB2-DDM data processing.
- g.** Gold-standard, phase randomization-corrected FSC curves from cryoSPARC and the reported resolution at FSC = 0.143 (dashed line).
- h.** Isosurface rendering of the 3D map with surface coloring according to the local resolution estimated by windowed FSC.



# Supplementary Figure 9

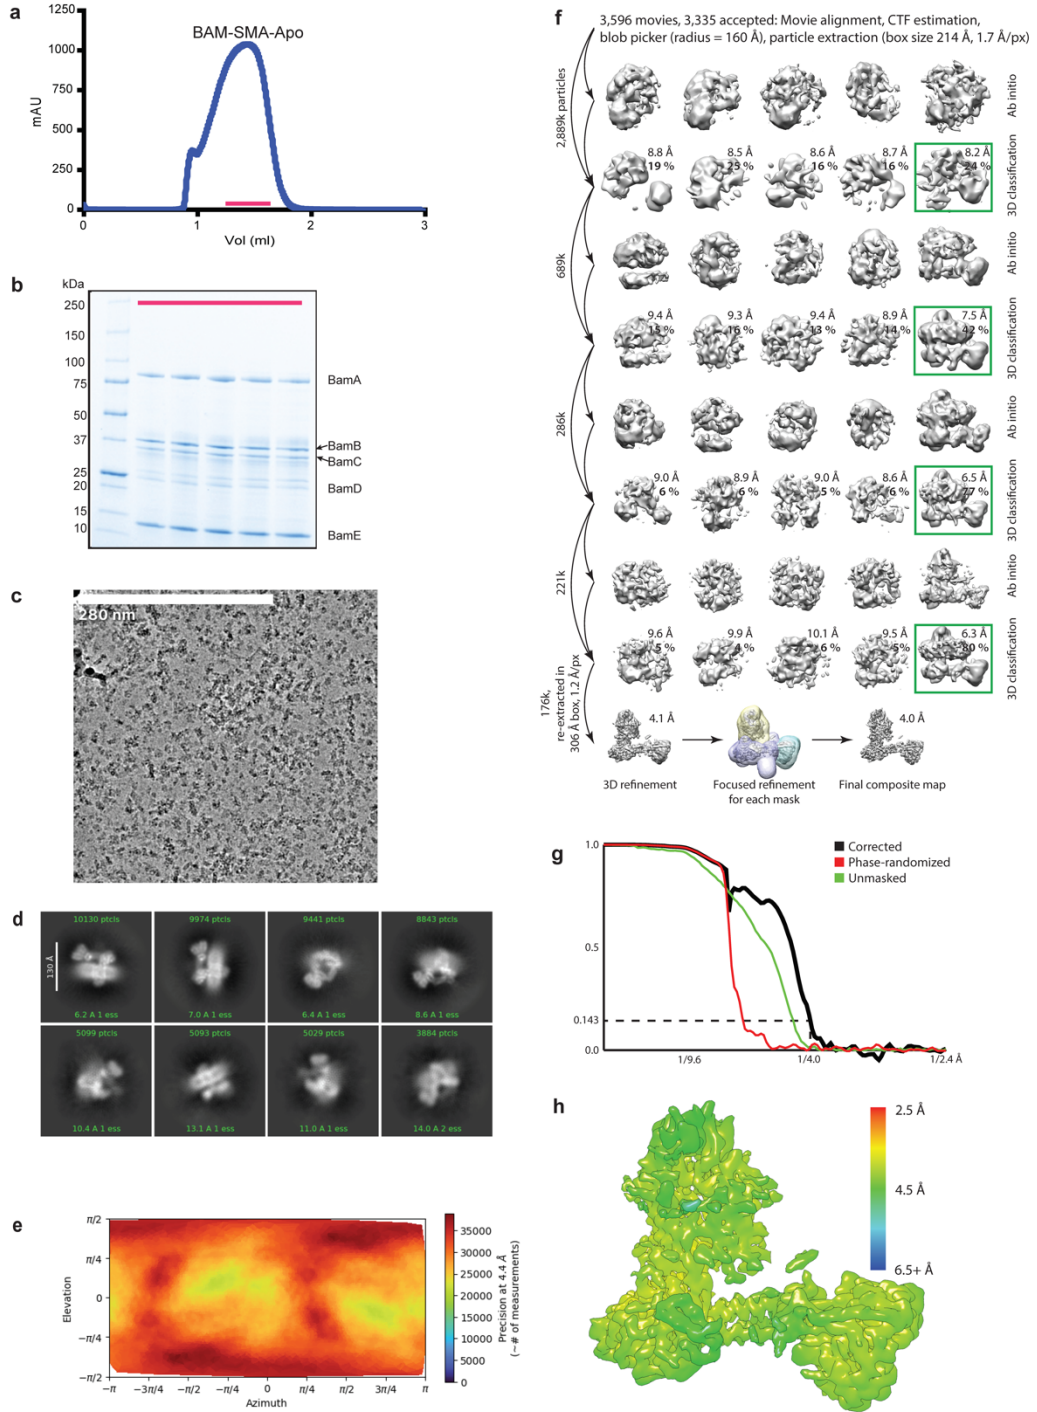

**Supplementary Figure 9. Cryo-EM imaging and structure determination of the apo BAM-SMA.**

- a.** SEC profile of the apo BAM-SMA complex.
- b.** SDS-PAGE analysis of the SEC of the apo BAM-SMA complex. Full uncropped gel image is included in Supplementary Data S9B in the Source Data.
- c.** Representative micrograph from the data set; white circles mark final particle selection.
- d.** Representative 2D classes from cryoSPARC containing the apo BAM-SMA complex (particle box size: 280 Å).
- e.** Direction-dependent Fourier-space coverage calculated in cryoSPARC, showing how many particle images contributed to the reconstruction in each direction.
- f.** Data processing workflow. CryoSPARC was used for all steps. Particles were sorted over 4 iterations of generating *ab initio* references and using them for supervised 3D classification. Green frames mark 3D classes selected for the next processing step.
- g.** Gold-standard, phase randomization-corrected FSC curve from cryoSPARC and the reported resolution at FSC=0.143 (dashed line).
- h.** Isosurface rendering of the 3D map with surface coloring according to the local resolution estimated by windowed FSC.

# Supplementary Figure 10

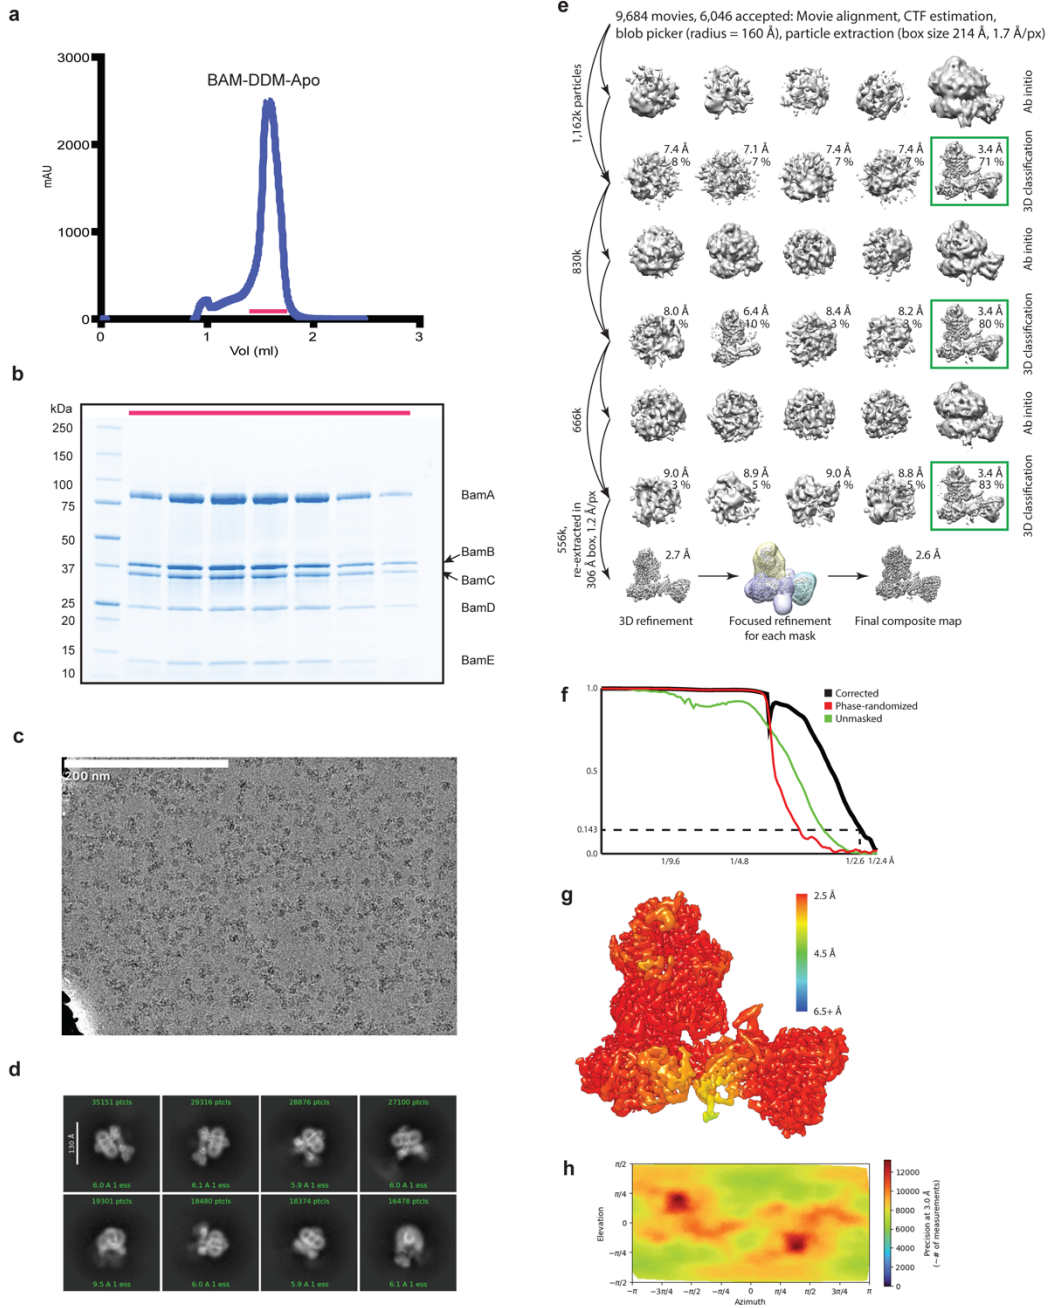

**Supplementary Figure 10. Cryo-EM imaging and structure determination of the apo BAM-DDM.**

- a.** SEC profile of the apo BAM-DDM complex.
- b.** SDS-PAGE analysis of the SEC of the apo BAM-DDM complex. Full uncropped gel image is included in Supplementary Data S10B in the Source Data.
- c.** Representative micrograph from the data set showing the particle distribution.
- d.** Representative 2D classes from cryoSPARC containing the apo BAM-DDM complex (particle box size: 307 Å).
- e.** Data processing workflow. CryoSPARC was used for all steps. Particles were sorted over 3 iterations of generating *ab initio* references and using them for supervised 3D classification. Green frames mark 3D classes selected for the next processing step.
- f.** Gold-standard, phase randomization-corrected FSC curve from cryoSPARC and the reported resolution at FSC=0.143 (dashed line).
- g.** Isosurface rendering of the 3D map with surface coloring according to the local resolution estimated by windowed FSC.
- h.** Direction-dependent Fourier-space coverage calculated in cryoSPARC, showing how many particle images contributed to the reconstruction in each direction.

# Supplementary Figure 11

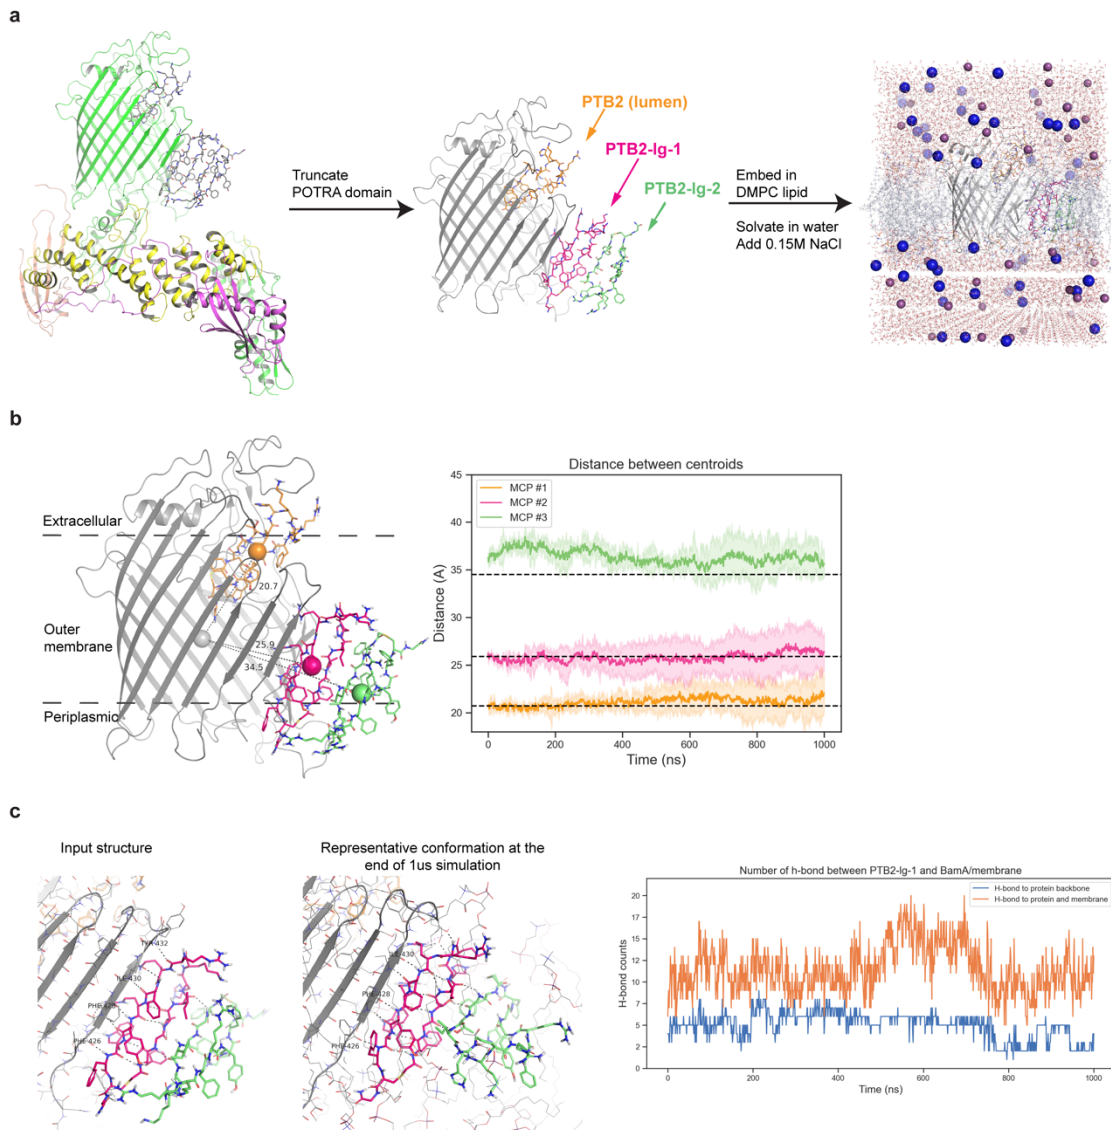

**Supplementary Figure 11. Molecular dynamics simulations of PTB2-BamA complex**

**a.** System setup for molecular dynamics simulations.

**b.** Stability of BamA and PTB2 during molecular dynamics simulations. Distance between the centroids of BamA and PTB2 remains stable during the 1  $\mu$ s molecular dynamics simulation.

**c.** Hydrogen bond interactions between BamA and lateral gate PTB2 molecules during molecular dynamics simulations. The number of hydrogen bonds between PTB2-Ig-1 and BamA backbone fluctuates but remains stable around three, while to BamA side chains and the membrane the number varies more around ten. Note that input and output files from molecular dynamics simulations are provided in Supplementary Data 3E in the Source Data.

## Supplementary Figure 12

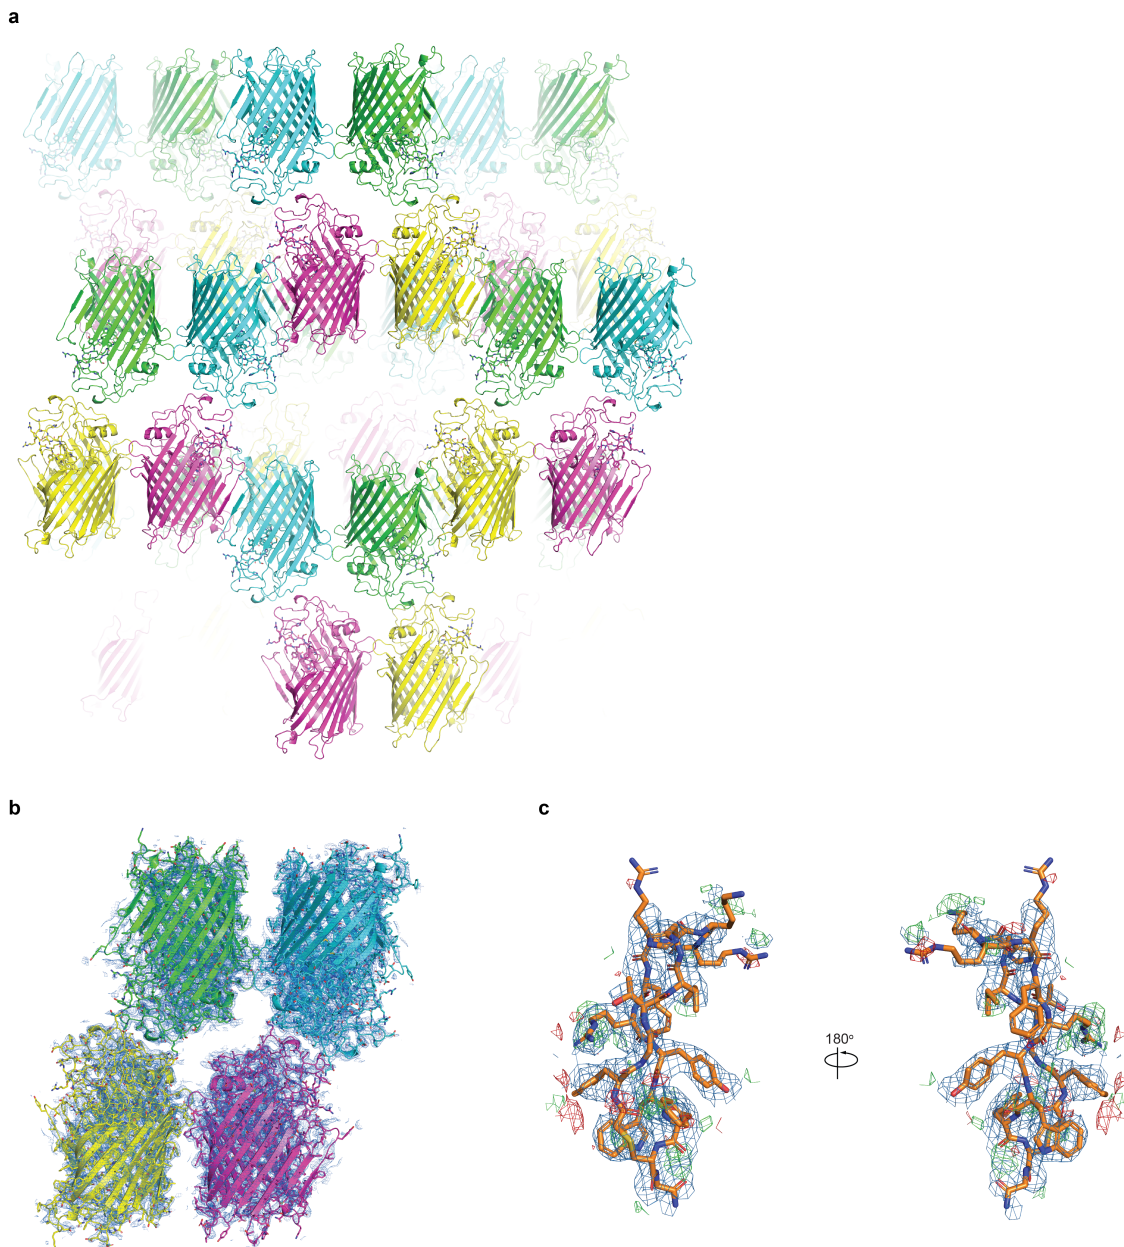

### Supplementary Figure 12. Crystal structure of PTB2-BamA complex.

**a.** Lattice packing of the PTB2-BamA complex with pairs of BamA molecules interacting inverted relative to each other.

**b.** Overall structure of the asymmetric unit content contains four PTB2-BamA complexes which were filled in a 2Fo-Fc map contoured at  $\sigma = 1$ .

**c.** 2Fo-Fc map (blue, contoured at  $1 \sigma$ ) and Fo-Fc map (green/red, contoured at  $\pm 3 \sigma$ ) for PTB2.

### Supplementary Figure 13

**a**

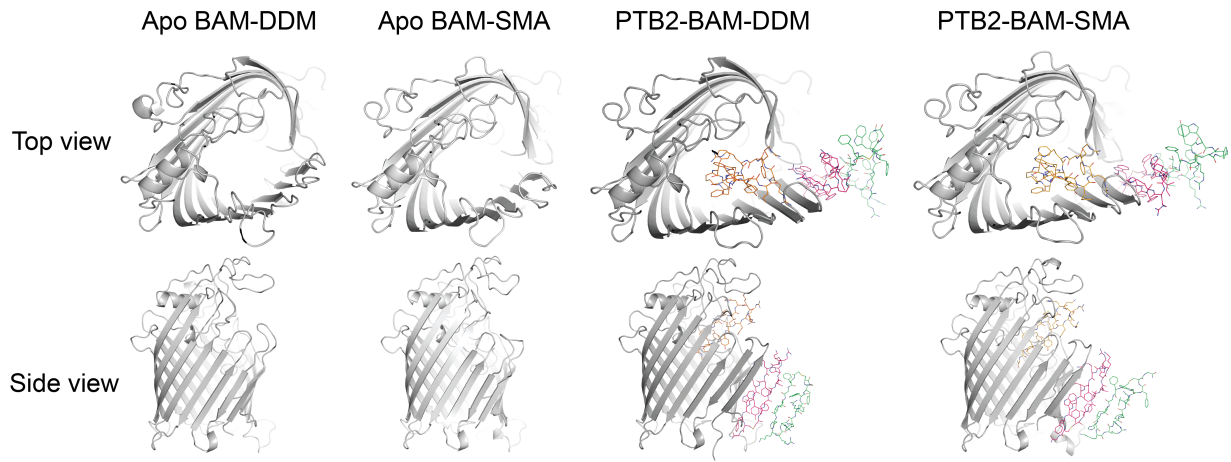

**b**

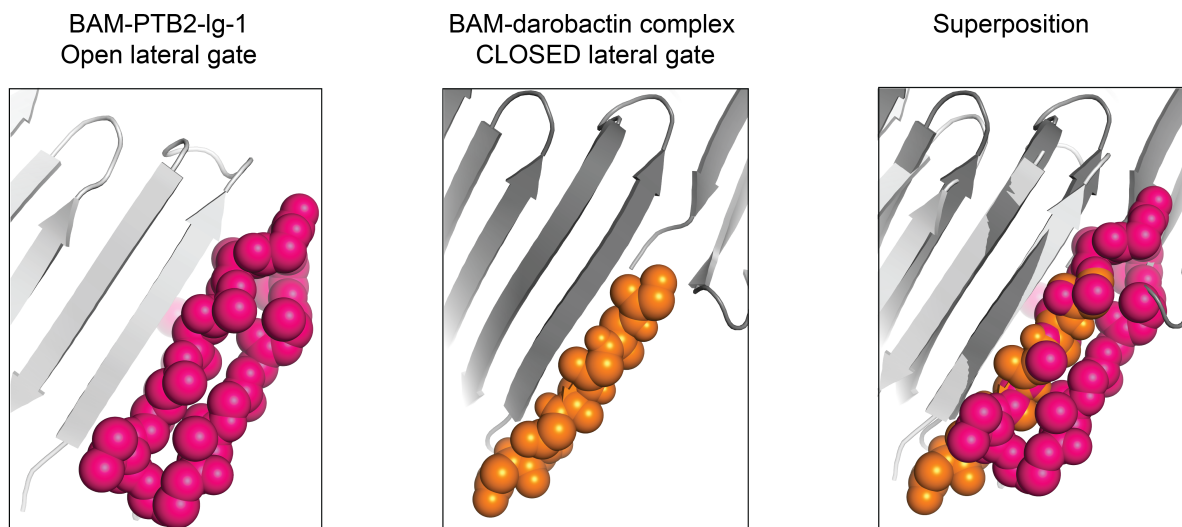

**c**

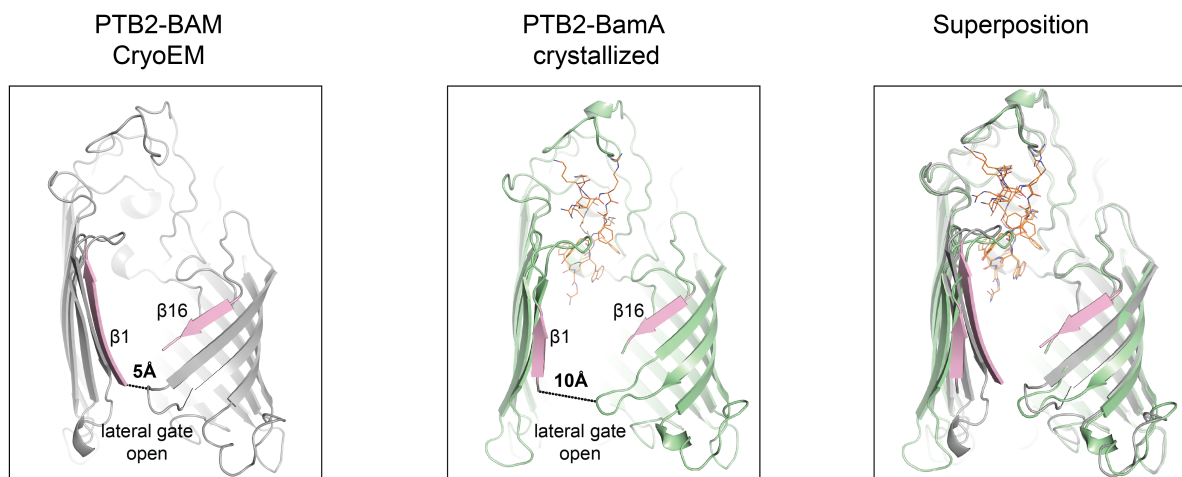



**Supplementary Figure 13. Comparison of PTB2-BAM complex**

**a.** Comparison of BamA  $\beta$ -barrel conformation in Apo and PTB2 bound states. Apo and PTB2 bound structures are displayed with both top view and side view.

**b.** Comparison between PTB2-BAM complex and BamA-darobactin structure. PTB2-Ig-1 backbone (pink) and darobactin backbone (orange) in the closed lateral gate of BAM (PDB: 7NRI<sup>2</sup>) are shown sphere representation for simplicity.

**c.** Comparison of the open lateral gate of BamA  $\beta$ -barrel between PTB2-BAM cryo-EM structure (gray) and PTB2-BamA crystal structure (green). BamA  $\beta$ 1 and A  $\beta$ 16 of the lateral gate are colored in light pink. The distance is measured between S425 and L789 (closeted with S425 in the lateral gate) in both PTB2-BAM cryo-EM and PTB2-BamA crystal structure.

## Supplementary Figure 14

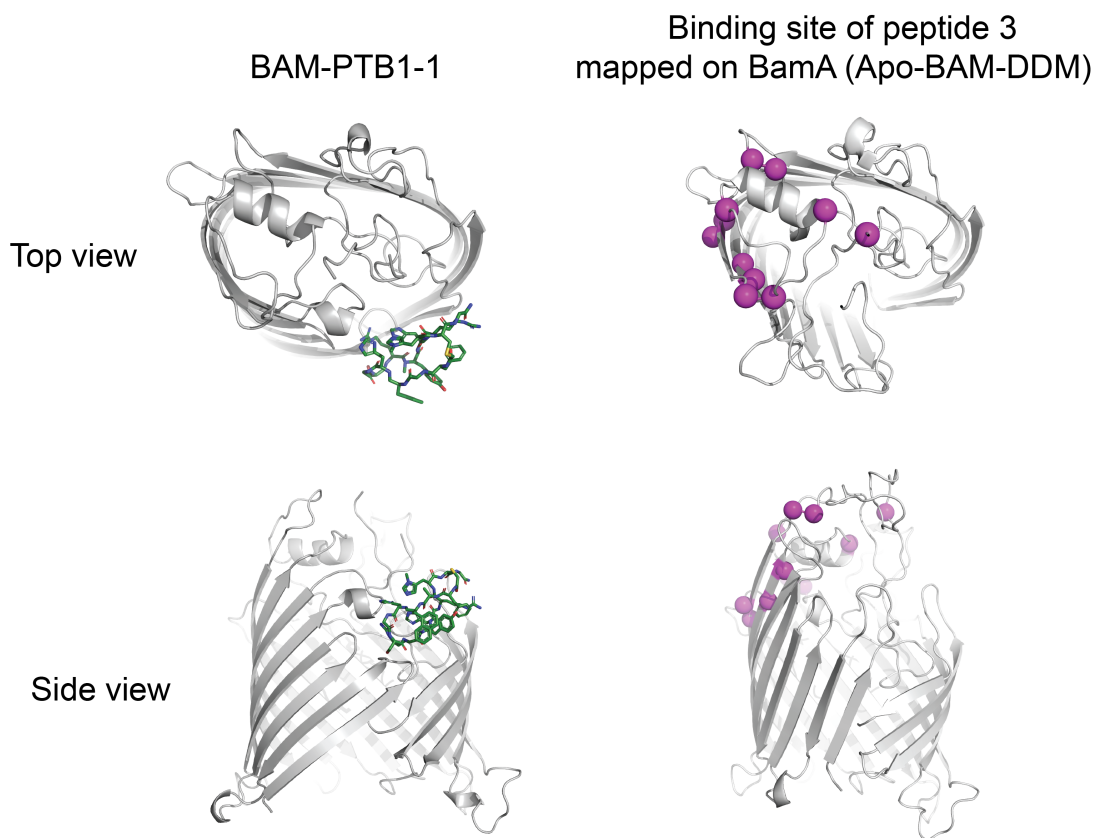

### Supplementary Figure 14. Comparison of PTB1-1-BAM complex

Comparison of BamA  $\beta$ -barrel conformation in PTB1-1 bound state with BamA with the mapped peptide 3<sup>3</sup> binding site, which was mapped by solution NMR studies in<sup>3</sup> from both top view and side view. PTB1-1 is shown as a green stick model. The identified binding site of peptide 3 is indicated on the Apo-BAM-DDM structure as purple spheres.

**Supplementary Table 1.** Cryo-EM data collection, refinement, and validation statistics.

|                                            | <b>PTB1-1-BAM</b>             | <b>Apo BAM-DDM</b>            | <b>PTB2-BAM-DDM</b>           | <b>Apo BAM-SMA</b>            | <b>PTB2-BAM-SMA</b>           |
|--------------------------------------------|-------------------------------|-------------------------------|-------------------------------|-------------------------------|-------------------------------|
|                                            | <b>EMD-45765<br/>PDB 9CNX</b> | <b>EMD-45764<br/>PDB 9CNW</b> | <b>EMD-45767<br/>PDB 9CNZ</b> | <b>EMD-45766<br/>PDB 9CNY</b> | <b>EMD-45768<br/>PDB 9CO0</b> |
| <b>Data Collection</b>                     |                               |                               |                               |                               |                               |
| Magnification                              | 165,000x                      | 105,000x                      | 130,000x                      | 36,000x                       | 165,000x                      |
| Voltage (kV)                               | 300                           | 300                           | 300                           | 200                           | 300                           |
| Camera                                     | Gatan K2 Summit               | Gatan K3                      | Gatan K2 Summit               | Gatan K2 Summit               | Falcon 4i                     |
| Electron exposure (e/Å <sup>2</sup> )      | 43                            | 64                            | 46                            | 52                            | 47                            |
| Defocus range (μm)                         | 0.5–3.0                       | 0.5–3.0                       | 0.5–3.0                       | 0.5–3.0                       | 0.5–3.0                       |
| Pixel size (Å)                             | 0.849                         | 0.838                         | 1.047                         | 1.148                         | 0.731                         |
| Energy filter slit width (eV)              | 20                            | 20                            | 20                            | —                             | 20                            |
| Number of frames                           | 80                            | 60                            | 50                            | 60                            | 40                            |
| <b>Image Processing</b>                    |                               |                               |                               |                               |                               |
| Symmetry imposed                           | C1                            | C1                            | C1                            | C1                            | C1                            |
| Particle box size (Å)                      | 372                           | 306                           | 306                           | 306                           | 306                           |
| Number of micrographs (no.)                | 38,156                        | 9,684                         | 17,756                        | 3,596                         | 18,319                        |
| Final particle images (no.)                | 124,444                       | 556,336                       | 181,444                       | 175,771                       | 78,053                        |
| Map resolution (Å)                         | 3.55                          | 2.6                           | 3.1                           | 4.0                           | 3.3                           |
| FSC threshold                              | 0.143                         | 0.143                         | 0.143                         | 0.143                         | 0.143                         |
| <b>Refinement</b>                          |                               |                               |                               |                               |                               |
| Initial models used (PDB code)             | PDB-5d0o                      | PDB-5ljo                      | PDB-5ljo                      | N/A Apo BAM-DDM               | N/A PTB2-BAM-DDM              |
| Volume CC                                  | 0.82                          | 0.82                          | 0.83                          | 0.76                          | 0.80                          |
| Ligand CC                                  | 0.78                          | —                             | 0.66                          | —                             | 0.60                          |
| Map-sharpening B-factors (Å <sup>2</sup> ) | -99                           | -111                          | -93                           | -169                          | -114                          |
| Non-hydrogen atoms                         | 11582                         | 11647                         | 12854                         | 10416                         | 10766                         |
| Protein residues                           | 1480                          | 1493                          | 1638                          | 1333                          | 1368                          |
| Waters                                     | 0                             | 0                             | 0                             | 0                             | 0                             |
| Ligands                                    | 2                             | 0                             | 3                             | 0                             | 3                             |
| <b>R.m.s. deviations</b>                   |                               |                               |                               |                               |                               |
| Bond lengths (Å)                           | 0.003                         | 0.004                         | 0.004                         | 0.004                         | 0.003                         |
| Bond angles (°)                            | 0.692                         | 0.987                         | 0.678                         | 1.018                         | 0.689                         |
| <b>Validation</b>                          |                               |                               |                               |                               |                               |
| MolProbity score                           | 1.02                          | 0.94                          | 1.19                          | 1.52                          | 1.34                          |
| Clashscore                                 | 1.93                          | 1.84                          | 3.44                          | 5.74                          | 4.93                          |
| Poor rotamers (%)                          | 0                             | 0                             | 0                             | 0                             | 0                             |
| <b>Ramachandran Plot</b>                   |                               |                               |                               |                               |                               |
| Favored (%)                                | 97.73                         | 98.24                         | 97.77                         | 96.66                         | 97.62                         |
| Allowed (%)                                | 2.27                          | 1.76                          | 2.23                          | 3.34                          | 2.38                          |
| Disallowed (%)                             | 0                             | 0                             | 0                             | 0                             | 0                             |

**Supplementary Table 2.** Crystallographic data collection and refinement statistics.

|                                                                  | <b>PTB2-BamA<br/>PDB 9CO2</b> |
|------------------------------------------------------------------|-------------------------------|
| <b>Data collection</b>                                           |                               |
| Space group                                                      | <i>P2<sub>1</sub></i>         |
| Cell dimensions                                                  |                               |
| <i>a</i> , <i>b</i> , <i>c</i> (Å)                               | 98.79, 167.27, 104.82         |
| $\alpha$ , $\beta$ , $\gamma$ (°)                                | 90, 110.99, 90                |
| Resolution (Å)                                                   | 97.86-2.74 (3.00-2.74)        |
| <i>R</i> <sub>pim</sub>                                          | 0.081 (0.485)                 |
| <i>I</i> / <i>sI</i>                                             | 6.0 (1.7)                     |
| Completeness<br>(%) <sup>a</sup>                                 | 90.1 (53.1)                   |
| Redundancy                                                       | 3.4 (3.4)                     |
| CC(1/2)                                                          | 0.997 (0.774)                 |
| <b>Refinement</b>                                                |                               |
| Resolution (Å)                                                   | 29.59-2.75                    |
| No. reflections                                                  | 47356 (281)                   |
| <i>R</i> <sub>work</sub> / <i>R</i> <sub>free</sub> <sup>b</sup> | 33.5/36.8                     |
| No. atoms <sup>c</sup>                                           | 12648                         |
| protein                                                          | 12632                         |
| ligand                                                           | 16                            |
| <i>B</i> -factors                                                | 60.40                         |
| protein                                                          | 60.38                         |
| ligand                                                           | 77.79                         |
| R.m.s. deviations                                                |                               |
| Bond lengths<br>(Å)                                              | 0.005                         |
| Bond angles (°)                                                  | 0.90                          |

Single crystal was collected for the data set.

Ramachandran plot: 94.85% favored, 4.64% allowed, 0.51% outlier.

<sup>a</sup> ellipsoidal completeness is 96.7% in 97.8-8.91 bin, but data were anisotropic in higher resolution shells (*a*\*=4.29, *b*\*=2.74, *c*\*=2.78).

<sup>b</sup> 5% of reflections used to calculate *R*<sub>free</sub>.

<sup>c</sup> represents all non-hydrogen atoms modeled.

**Supplementary Table 3.** Strains, plasmids, and primers used in this study.

| IDENTIFIER            |                          | DESCRIPTION |               |          |
|-----------------------|--------------------------|-------------|---------------|----------|
| Strain number         | Species                  | Strain name | BamA mutation | Source   |
| GNE 115               | <i>E. coli</i>           | BW25113     |               | 4        |
| GNE 178               | <i>E. coli</i>           | ATCC 25922  |               | ATCC     |
| GNE 15                | <i>K. pneumoniae</i>     | ATCC 43816  |               | ATCC     |
| GNE 18                | <i>E. aerogenes</i>      | ATCC 13048  |               | ATCC     |
| GNE 19                | <i>E. cloacae</i>        | ATCC 222    |               | ATCC     |
| GNE 23                | <i>S. aureus</i>         | USA300      |               |          |
|                       |                          |             |               |          |
| GNE 4349              | <i>E. coli</i>           | BW25113     | N492K         | in-house |
| GNE 4443              | <i>E. coli</i>           | BW25114     | G437C         | in-house |
| GNE 4458              | <i>E. coli</i>           | BW25115     | G437S         | in-house |
| GNE 4455              | <i>E. coli</i>           | BW25116     | D464A         | in-house |
| GNE 4460              | <i>E. coli</i>           | BW25117     | D464N         | in-house |
| GNE 4461              | <i>E. coli</i>           | BW25118     | F492V         | in-house |
| GNE 4462              | <i>E. coli</i>           | BW25119     | Δ492-496insS  | in-house |
| GNE 4455              | <i>E. coli</i>           | BW25119     | F494A         | in-house |
| GNE 4448              | <i>E. coli</i>           | BW25119     | F494V         | in-house |
| GNE 4449              | <i>E. coli</i>           | BW25120     | A499V         | in-house |
| GNE 4444              | <i>E. coli</i>           | BW25121     | D500N         | in-house |
| GNE 4452              | <i>E. coli</i>           | BW25122     | L501P         | in-house |
| GNE 4463              | <i>E. coli</i>           | BW25125     | Q664H         | in-house |
| GNE 4464              | <i>E. coli</i>           | BW25127     | E800K         | in-house |
|                       |                          |             |               |          |
| Sequencing primers    |                          |             |               |          |
| <i>bamA</i> outside F | GCATCTGCTGTTTCCTTGCGATC  |             |               |          |
| <i>bamA</i> outside R | CGTGTTAGAAACACCGGTTTTCTG |             |               |          |

### Supplementary References

1. Gu et al. Structural basis of outer membrane protein insertion by the BAM complex. *Nature* **531**: 64-69 (2016).
2. Kaur et al. The antibiotic darobactin mimics  $\beta$ -strand to inhibit outer membrane insertase. *Nature* **593**: 125-129 (2021).
3. Luther et al. Chimeric peptidomimetic antibiotics against gram-negative bacteria. *Nature* **576**: 452-458 (2019).
4. Datsenko and Wanner. One-step inactivation of chromosomal genes in *Escherichia coli* K-12 using PCR products. *Proceedings of the National Academy of Sciences* **97**: 6640-6645 (2000).
